# Supplementary material for: Metabolic drug survey highlights cancer cell dependencies and vulnerabilities
Source: PubMed Central journal article supplement (PMC8671470; doi:10.1038/s41467-021-27329-x), 2021-12-14
Supplement: 41467_2021_27329_MOESM3_ESM.pdf [file 41467_2021_27329_MOESM3_ESM.pdf]

## **Description of Additional Supplementary Files**

**Supplementary Data 1:** CeMM Library of Metabolic Drugs (CLIMET).

**Supplementary Data 2:** Drug sensitivity profiles of AML and CML cell lines. This supplementary data contains the drug sensitivity data including mean % Survival for each drug tested in each cell line, IC50 values in uM and AUC values used for downstream analysis.

**Supplementary Data 3:** Drug sensitivity profiles of AML and CML patient samples. This supplementary data contains the drug sensitivity data including mean % Survival for each drug tested in each patient sample and AUC values used for downstream analysis.
